# Supplementary material
Source: ML conference proceedings conference paper supplement (https://proceedings.neurips.cc/paper_files/paper/2021/hash/be37ff14df68192d976f6ce76c6cbd15-Abstract.html)
Supplement: Supplementary file 1 [file be37ff14df68192d976f6ce76c6cbd15-Supplemental.zip]

Archive with 24 entries (22 files):
- learning_disentangled_behavior-Supplementary Material/
- __MACOSX/._learning_disentangled_behavior-Supplementary Material
- learning_disentangled_behavior-Supplementary Material/Appendix.pdf
- __MACOSX/learning_disentangled_behavior-Supplementary Material/._Appendix.pdf
- learning_disentangled_behavior-Supplementary Material/Video_Generation/
- __MACOSX/learning_disentangled_behavior-Supplementary Material/._Video_Generation
- learning_disentangled_behavior-Supplementary Material/Video_Generation/generated_vid2.mp4
- __MACOSX/learning_disentangled_behavior-Supplementary Material/Video_Generation/._generated_vid2.mp4
- learning_disentangled_behavior-Supplementary Material/Video_Generation/orig_vid.mp4
- __MACOSX/learning_disentangled_behavior-Supplementary Material/Video_Generation/._orig_vid.mp4
- learning_disentangled_behavior-Supplementary Material/Video_Generation/generated_vid3.mp4
- __MACOSX/learning_disentangled_behavior-Supplementary Material/Video_Generation/._generated_vid3.mp4
- learning_disentangled_behavior-Supplementary Material/Video_Generation/generated_vid1.mp4
- __MACOSX/learning_disentangled_behavior-Supplementary Material/Video_Generation/._generated_vid1.mp4
- learning_disentangled_behavior-Supplementary Material/Video_Generation/generated_vid0.mp4
- __MACOSX/learning_disentangled_behavior-Supplementary Material/Video_Generation/._generated_vid0.mp4
- learning_disentangled_behavior-Supplementary Material/Video_Generation/generated_vid4.mp4
- __MACOSX/learning_disentangled_behavior-Supplementary Material/Video_Generation/._generated_vid4.mp4
- learning_disentangled_behavior-Supplementary Material/Video_Generation/generated_vid5.mp4
- __MACOSX/learning_disentangled_behavior-Supplementary Material/Video_Generation/._generated_vid5.mp4
- learning_disentangled_behavior-Supplementary Material/Video_Generation/generated_vid7.mp4
- __MACOSX/learning_disentangled_behavior-Supplementary Material/Video_Generation/._generated_vid7.mp4
- learning_disentangled_behavior-Supplementary Material/Video_Generation/generated_vid6.mp4
- __MACOSX/learning_disentangled_behavior-Supplementary Material/Video_Generation/._generated_vid6.mp4
